# Supplementary material
Source: MDPI journal article supplement (https://www.mdpi.com/1424-2818/16/3/181)
Supplement: s1 [file s1]

# Global Warming Drives Transitions in Suitable Habitats and Ecological Services of Rare *Tinospora* Miers Species in China

Huayong Zhang <sup>1,2,\*</sup>, Zhe Li <sup>1</sup>, Hengchao Zou <sup>1</sup>, Zhongyu Wang <sup>1</sup>, Xinyu Zhu <sup>3</sup>, Yihe Zhang <sup>4</sup> and Zhao Liu <sup>2</sup>

<sup>1</sup> Research Center for Engineering Ecology and Nonlinear Science, North China Electric Power University, Beijing 102206, China; 120212232023@ncepu.edu.cn (Z.L.); zouhc@ncepu.edu.cn (H.Z.); zhy\_wang@ncepu.edu.cn (Z.W.)

<sup>2</sup> Theoretical Ecology and Engineering Ecology Research Group, School of Life Sciences, Shandong University, Qingdao 250100, China; liuzhao9555@sdu.edu.cn

<sup>3</sup> Dalian Eco-Environmental Affairs Service Center, No. 58 Lianshan Street, Shahekou District, Dalian 116026, China; suzaneilbeck@gmail.com

<sup>4</sup> School of Engineering, RMIT University, P.O. Box 71, Bundoora, VIC 3083, Australia; henin.zhang@rmit.edu.au

\* Correspondence: zhanghuayong@sdu.edu.cn; Tel.: +86-010-61773936

## This word file includes

## Figure and Table Legends

**Table S1** Average AUC values of training and testing sets for each species

| Species               | Train data AUC | Test data AUC | Standard deviation |
|-----------------------|----------------|---------------|--------------------|
| <i>T. craveniana</i>  | 0.989          | 0.988         | 0.005              |
| <i>T. yunnanensis</i> | 0.989          | 0.989         | 0.003              |
| <i>T. sinensis</i>    | 0.988          | 0.983         | 0.003              |

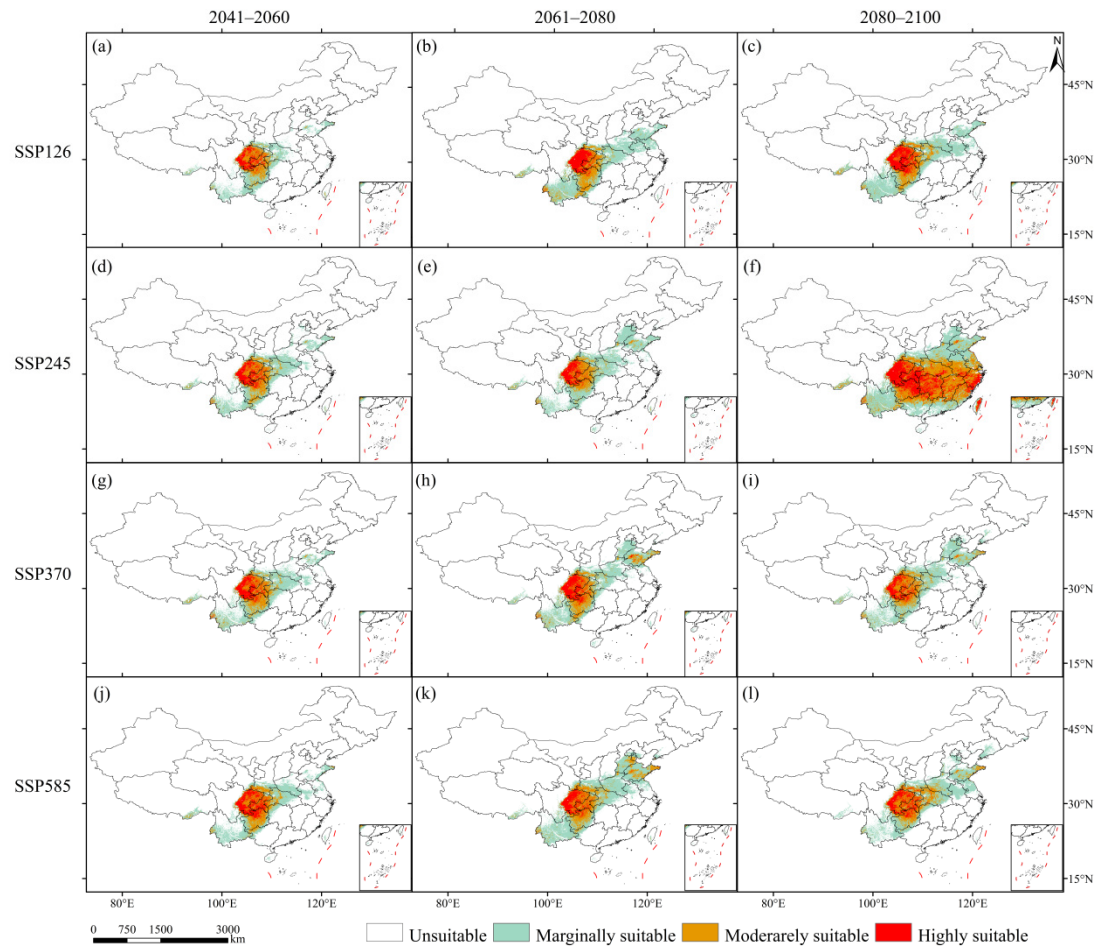

**Figure S1,** Potential distribution habitats of *T. craveniana* under the future climate scenario

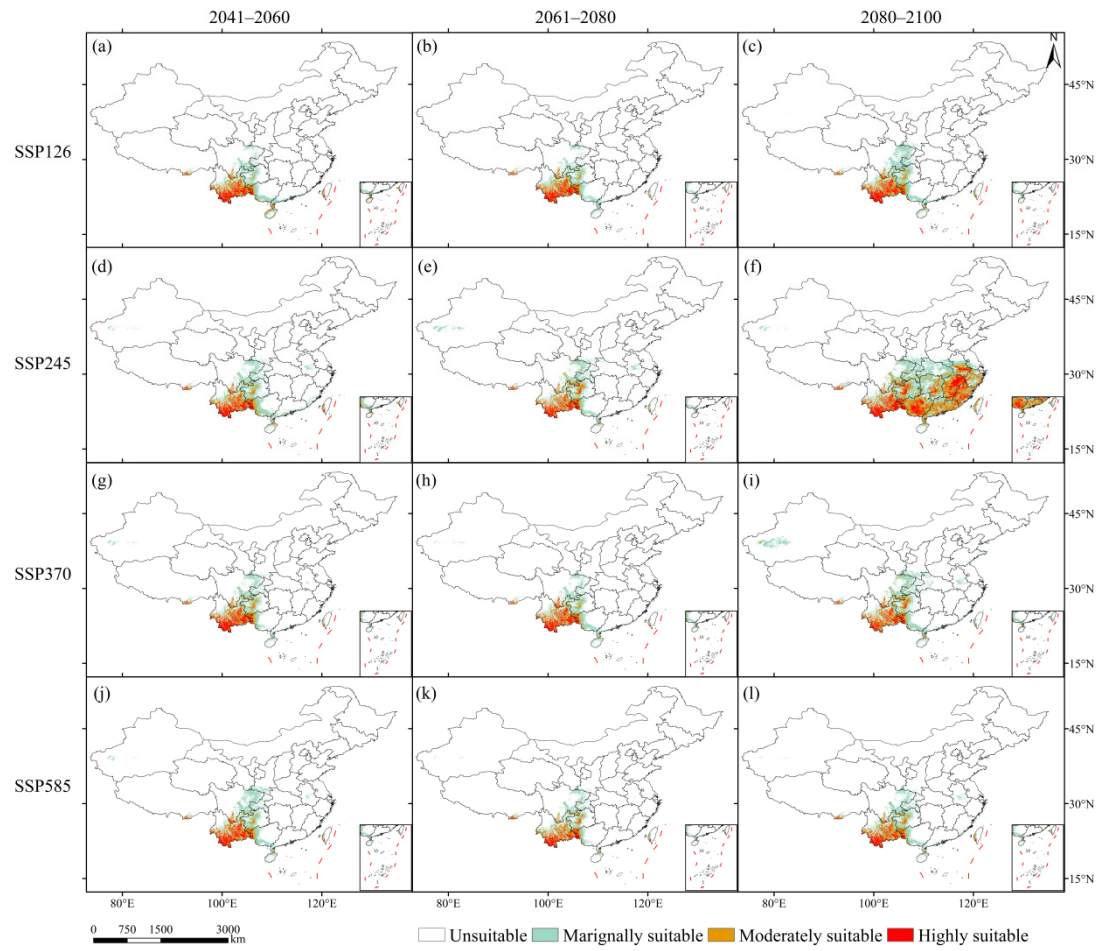

**Figure S2,** Potential distribution habitats of *T. yunnanensis* under the future climate scenario

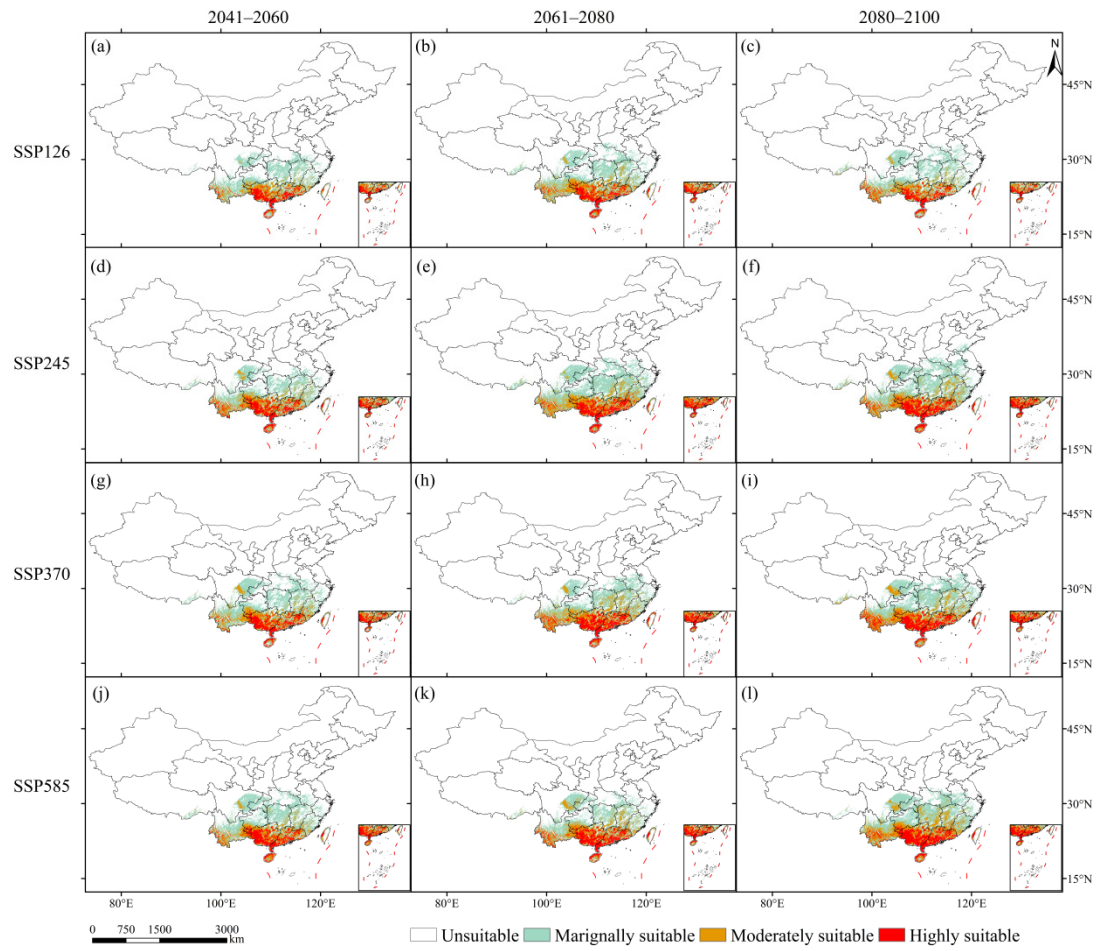

**Figure S3,** Potential distribution habitats of *T. sinensis* under the future climate scenario

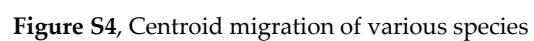

**Figure S4, Centroid migration of various species**

**Table S2** Change of Suitable habitat area ( $\times 10^4$  km<sup>2</sup>) and its ratio (%) for each species

| Species                                            | Years     | Climate Scenario | Lost  |       | Remain |       | Gain   |                       | Distribution Change Trend |
|----------------------------------------------------|-----------|------------------|-------|-------|--------|-------|--------|-----------------------|---------------------------|
|                                                    |           |                  | Area  | Ratio | Area   | Ratio | Area   | Ratio                 |                           |
| <i>Tinospora sagittata</i> var. <i>craveniana</i>  | 2041-2060 | SSP126           | 30.17 | 3.14  | 82.63  | 8.61  | 4.74   | 0.49                  | Contraction               |
|                                                    |           | SSP245           | 18.25 | 1.90  | 94.55  | 9.85  | 19.01  | 1.98                  | Expansion                 |
|                                                    |           | SSP370           | 13.15 | 1.37  | 99.65  | 10.38 | 17.74  | 1.85                  | Expansion                 |
|                                                    |           | SSP585           | 15.42 | 1.61  | 97.39  | 10.14 | 21.42  | 2.23                  | Expansion                 |
|                                                    | 2061-2080 | SSP126           | 9.35  | 0.97  | 103.46 | 10.78 | 32.76  | 3.41                  | Expansion                 |
|                                                    |           | SSP245           | 23.87 | 2.49  | 88.94  | 9.26  | 36.53  | 3.81                  | Expansion                 |
|                                                    |           | SSP370           | 16.18 | 1.69  | 96.63  | 10.07 | 40.07  | 4.17                  | Expansion                 |
|                                                    |           | SSP585           | 13.90 | 1.45  | 98.90  | 10.3  | 61.49  | 6.40                  | Expansion                 |
|                                                    | 2081-2100 | SSP126           | 4.59  | 0.48  | 108.21 | 11.27 | 34.55  | 3.56                  | Expansion                 |
|                                                    |           | SSP245           | 0.55  | 0.057 | 112.26 | 11.69 | 162.72 | 16.96                 | Expansion                 |
|                                                    |           | SSP370           | 19.30 | 2.01  | 93.50  | 9.74  | 43.71  | 4.55                  | Expansion                 |
|                                                    |           | SSP585           | 21.97 | 2.29  | 90.83  | 9.46  | 53.00  | 5.52                  | Expansion                 |
| <i>Tinospora sagittata</i> var. <i>yunmanensis</i> | 2041-2060 | SSP126           | 28.30 | 2.95  | 56.13  | 5.85  | 0.26   | 0.027                 | Contraction               |
|                                                    |           | SSP245           | 15.69 | 1.63  | 68.74  | 7.16  | 1.12   | 0.11                  | Contraction               |
|                                                    |           | SSP370           | 24.85 | 2.59  | 59.57  | 6.21  | 0.73   | 0.075                 | Contraction               |
|                                                    |           | SSP585           | 18.84 | 1.96  | 65.59  | 6.83  | 0.74   | 0.076                 | Contraction               |
|                                                    | 2061-2080 | SSP126           | 29.91 | 3.11  | 54.52  | 5.68  | 0.085  | 8.82*10 <sup>-5</sup> | Contraction               |
|                                                    |           | SSP245           | 22.68 | 2.36  | 61.74  | 6.43  | 2.47   | 0.26                  | Contraction               |
|                                                    |           | SSP370           | 27.67 | 2.88  | 56.75  | 5.91  | 0.50   | 0.052                 | Contraction               |
|                                                    |           | SSP585           | 32.45 | 3.38  | 51.97  | 5.41  | 0.11   | 0.012                 | Contraction               |
|                                                    | 2081-     | SSP126           | 17.92 | 1.87  | 66.50  | 6.93  | 0.010  | 1.06*10 <sup>-5</sup> | Contraction               |
|                                                    |           |                  |       |       |        |       |        |                       |                           |

|                           |           |        |       |                       |       |      |        |       |             |
|---------------------------|-----------|--------|-------|-----------------------|-------|------|--------|-------|-------------|
| <i>Tinospora sinensis</i> | 2100      | SSP245 | 7.69  | 0.80                  | 76.76 | 8.00 | 111.46 | 11.61 | Expansion   |
|                           |           | SSP370 | 16.43 | 1.71                  | 68.00 | 7.08 | 8.02   | 0.84  | Contraction |
|                           |           | SSP585 | 22.81 | 2.38                  | 61.61 | 6.42 | 0.20   | 0.021 | Contraction |
|                           |           | SSP126 | 1.52  | 0.18                  | 88.45 | 9.21 | 27.22  | 2.84  | Expansion   |
|                           | 2041-2060 | SSP245 | 0.45  | 0.047                 | 89.51 | 9.32 | 38.48  | 4.01  | Expansion   |
|                           |           | SSP370 | 0.30  | 0.030                 | 89.66 | 9.34 | 53.00  | 5.52  | Expansion   |
|                           |           | SSP585 | 0.41  | 0.043                 | 89.55 | 9.33 | 51.77  | 5.39  | Expansion   |
|                           |           | SSP126 | 0.26  | 0.023                 | 89.74 | 9.35 | 49.78  | 5.19  | Expansion   |
|                           | 2061-2080 | SSP245 | 0.013 | 1.43*10 <sup>-5</sup> | 89.95 | 9.37 | 73.76  | 7.68  | Expansion   |
|                           |           | SSP370 | 0.29  | 0.030                 | 89.67 | 9.34 | 59.94  | 6.24  | Expansion   |
|                           |           | SSP585 | 0.12  | 0.013                 | 89.84 | 9.36 | 45.09  | 4.70  | Expansion   |
|                           |           | SSP126 | 0.43  | 0.045                 | 89.53 | 9.33 | 35.07  | 3.65  | Expansion   |
|                           | 2081-2100 | SSP245 | 0.15  | 0.015                 | 89.81 | 9.36 | 73.29  | 7.63  | Expansion   |
|                           |           | SSP370 | 0     | 0                     | 89.96 | 9.37 | 72.91  | 7.59  | Expansion   |
|                           |           | SSP585 | 0.72  | 0.075                 | 89.24 | 9.30 | 79.46  | 8.23  | Expansion   |
|                           |           |        |       |                       |       |      |        |       |             |

**Table S3** Assessment of the ecological service value of genus *Tinospora* under present climate scenarios (10<sup>4</sup> CNY).

| Value category         | <i>Tinospora sagittata</i><br>var. <i>craveniana</i> | <i>Tinospora sagittata</i><br>var. <i>yunnanensis</i> | <i>Tinospora sinensis</i> |
|------------------------|------------------------------------------------------|-------------------------------------------------------|---------------------------|
| Economic               | 24989.88                                             | 27005.86                                              | 21377.89                  |
| Atmospheric regulation | 867.15                                               | 937.11                                                | 741.82                    |
| Cultivation            | 7095.97                                              | 8986.16                                               | 6070.33                   |
| Soil conservation      | 1955.46                                              | 2113.21                                               | 1672.82                   |
| Tourist                | 26.78                                                | 28.94                                                 | 22.91                     |
| Biodiversity           | 74.73                                                | 80.76                                                 | 63.93                     |
| Total                  | 35009.97                                             | 37834.3                                               | 29949.7                   |

**Table S4.** Future ecological service value of species of the *Tinospora* (10<sup>4</sup> CNY).

| Species                                            | Years     | Climate Scenario | Economic  | Atmospheric regulation | Cultivation | Soil conservation | Tourism | Biodiversity | Total     |
|----------------------------------------------------|-----------|------------------|-----------|------------------------|-------------|-------------------|---------|--------------|-----------|
| <i>Tinospora sagittata</i> var. <i>craveniana</i>  | 2041-2060 | SSP126           | 22742.89  | 789.18                 | 6457.93     | 1779.64           | 24.37   | 68.01        | 31862.02  |
|                                                    |           | SSP245           | 29462.85  | 1022.37                | 8366.09     | 2305.47           | 31.57   | 88.11        | 41276.46  |
|                                                    |           | SSP370           | 29609.85  | 1027.47                | 8407.83     | 2316.98           | 31.73   | 88.55        | 41482.41  |
|                                                    |           | SSP585           | 36476.82  | 1265.75                | 10537.73    | 2854.32           | 9.08    | 109.08       | 51252.78  |
|                                                    | 2061-2080 | SSP126           | 32612.84  | 1131.67                | 9260.54     | 2551.96           | 34.94   | 97.53        | 45689.48  |
|                                                    |           | SSP245           | 25283.87  | 877.35                 | 7179.45     | 1978.47           | 27.09   | 75.61        | 35421.84  |
|                                                    |           | SSP370           | 34838.83  | 1205.91                | 9892.62     | 2726.15           | 37.33   | 104.19       | 48805.03  |
|                                                    |           | SSP585           | 29441.85  | 1021.64                | 8360.13     | 2303.83           | 31.55   | 88.05        | 41247.05  |
|                                                    | 2081-2100 | SSP126           | 40676.80  | 1411.49                | 11550.33    | 3182.97           | 43.58   | 121.64       | 56986.81  |
|                                                    |           | SSP245           | 115184.42 | 3996.92                | 32707.05    | 9013.21           | 123.41  | 344.46       | 161369.47 |
|                                                    |           | SSP370           | 25808.87  | 895.58                 | 7328.53     | 2019.54           | 27.65   | 77.18        | 36157.35  |
|                                                    |           | SSP585           | 33074.83  | 1147.70                | 9391.73     | 2588.11           | 35.44   | 98.91        | 46336.72  |
| <i>Tinospora sagittata</i> var. <i>yunnanensis</i> | 2041-2060 | SSP126           | 17849.91  | 619.40                 | 5068.55     | 1396.76           | 19.13   | 53.38        | 25007.13  |
|                                                    |           | SSP245           | 18962.91  | 658.02                 | 5384.59     | 1483.85           | 20.32   | 56.71        | 26566.4   |
|                                                    |           | SSP370           | 20831.90  | 722.87                 | 5915.30     | 1630.10           | 22.32   | 62.30        | 29184.79  |
|                                                    |           | SSP585           | 19340.90  | 671.13                 | 5491.92     | 1513.43           | 20.72   | 57.84        | 27095.94  |
|                                                    | 2061-2080 | SSP126           | 17954.91  | 623.04                 | 5098.37     | 1404.98           | 19.24   | 53.69        | 25154.23  |
|                                                    |           | SSP245           | 16820.92  | 583.69                 | 4776.36     | 1316.24           | 18.02   | 50.30        | 23565.53  |
|                                                    |           | SSP370           | 18269.91  | 633.97                 | 5187.81     | 1429.62           | 19.58   | 54.64        | 25595.53  |
|                                                    |           | SSP585           | 10961.95  | 380.38                 | 3112.69     | 857.77            | 11.75   | 32.78        | 15357.32  |
|                                                    | 2081-2100 | SSP126           | 19550.90  | 678.42                 | 5551.55     | 1529.86           | 20.95   | 58.47        | 27390.15  |
|                                                    |           | SSP245           | 61445.69  | 2132.18                | 17447.74    | 4808.14           | 65.84   | 183.75       | 86083.34  |
|                                                    |           | SSP370           | 16631.92  | 577.13                 | 4722.70     | 1301.45           | 17.82   | 49.74        | 23300.76  |
|                                                    |           | SSP585           | 16190.91  | 561.83                 | 4597.47     | 1266.94           | 17.35   | 48.42        | 22682.92  |



|                           |       |        |          |         |          |         |       |        |          |
|---------------------------|-------|--------|----------|---------|----------|---------|-------|--------|----------|
| <i>Tinospora sinensis</i> |       | SSP126 | 27950.86 | 969.90  | 7936.75  | 2187.16 | 29.95 | 83.59  | 39158.21 |
|                           | 2041- | SSP245 | 40172.80 | 1394.00 | 11407.22 | 3143.53 | 43.04 | 120.13 | 56280.72 |
|                           | 2060  | SSP370 | 37925.81 | 1316.03 | 10769.18 | 2967.70 | 40.64 | 113.42 | 53132.78 |
|                           |       | SSP585 | 41390.79 | 1436.27 | 11753.07 | 3238.83 | 44.35 | 123.79 | 57987.1  |
|                           |       | SSP126 | 34817.83 | 1208.18 | 9886.65  | 2724.50 | 37.31 | 104.12 | 48778.59 |
|                           | 2061- | SSP245 | 43910.78 | 1523.71 | 12468.63 | 3436.03 | 47.05 | 131.31 | 61517.51 |
|                           | 2080  | SSP370 | 50168.75 | 1740.86 | 14245.61 | 3925.72 | 53.75 | 150.03 | 70284.72 |
|                           |       | SSP585 | 46871.77 | 1626.46 | 13309.42 | 3667.73 | 50.22 | 140.17 | 65665.77 |
|                           |       | SSP126 | 30764.85 | 1067.55 | 8735.80  | 2407.36 | 32.96 | 92.00  | 43100.52 |
|                           | 2081- | SSP245 | 48950.76 | 1698.60 | 13899.75 | 3830.41 | 52.45 | 146.39 | 68578.36 |
|                           | 2100  | SSP370 | 52793.74 | 1831.95 | 14990.98 | 4131.12 | 56.57 | 157.88 | 73962.24 |
|                           |       | SSP585 | 55145.72 | 1913.57 | 15658.84 | 4315.16 | 59.09 | 164.91 | 77257.29 |
